# Supplementary material for: Steric desolvation enhances the effective molarities of intramolecular H-bonding interactions
Source: Royal Society of Chemistry journal article supplement (doi:10.1039/c2ob25372k), 2012-01-01
Supplement: c2ob25372k.pdf [file c2ob25372k.pdf]

# Solvent Effects on Chelate Cooperativity: Comparative Analysis of Intramolecular H-bonding Interactions in Toluene, 1,1,2,2-Tetrachloroethane and Cyclohexanone

Elena Chekmeneva, Christopher A. Hunter,\* Maria Cristina Misuraca and Simon M. Turega

## 5 Partially Bound States Analysis

**One H-bond.** For complexes that can make a single intramolecular H-bond, the observed association constant is given by the sum of the equilibrium constants for the fully bound and partially bound states (Equation S1).

$$K_{obs} = K_0(1 + \sigma_1 K_1 EM_1) \quad (S1)$$

where  $K_0$  is intermolecular association constant for formation of the zinc-nitrogen interaction,  $K_1$  is the intermolecular association constant for formation of the H-bonding interaction,  $EM_1$  is the effective molarity for the intramolecular interaction, and  $\sigma_1$  is a statistical factor that describes the degeneracy of the fully bound state. In the complexes discussed here, the porphyrins all have four identical H-bond donor sites, so  $\sigma_1 = 4$ .

So, the parameter  $f$  required for the determination of  $EM$  using the double mutant cycle analysis is given by Equation S2.

$$f = 1 + \sigma_1 K_1 EM_1 \quad (S2)$$

15 The population of the fully bound state,  $P_b$ , is given by

$$P_b = \frac{\sigma_1 K_1 EM_1}{1 + \sigma_1 K_1 EM_1} \quad (S3)$$

and the population of the partially bound state,  $P_f$ , where the intramolecular H-bond is not made is given by

$$P_f = \frac{1}{1 + \sigma_1 K_1 EM_1} \quad (S4)$$

**Two H-bonds.** For complexes that can make two identical intramolecular H-bonds, the observed association constant is given by the sum of the equilibrium constants for the fully bound and two partially bound states (Equation S5).

$$f = 1 + \sigma_1 K_1 EM_1 + \sigma_{11} (K_1 EM_1)^2 \quad (S5)$$

We assume that the effective molarity for the formation of the first H-bond is not affected by the formation of the second H-bond, so that  $K_1 EM_1$  is a constant (Equation S6).

$$K_1 EM_1 = \frac{-\sigma_1 + \sqrt{\sigma_1^2 - 4\sigma_{11}(1 - e^{-\Delta\Delta G^\circ/RT})}}{2\sigma_{11}} \quad (S6)$$

25 Assumptions about the statistical factors are required in order to deduce values of  $K_1 EM_1$ . For the partially bound, singly H-bonded complex,  $\sigma_1 = 8$ . For the fully bound, doubly H-bonded complex, there are two degenerate states in which two H-bonds are made with phenol groups on trans-related meso positions on the porphyrin, and four degenerate states in which two H-bonds are made with phenol groups on cis-related meso positions. Models suggest that all states are equally accessible, so  $\sigma_{11} = 6$ , but this value may be as low as 2, if the cis states are inaccessible.

30

**Table S1** Statistical factors for complexes formed with ligands L2a-L6a.

|               | Ligand |     |     |     |     |
|---------------|--------|-----|-----|-----|-----|
|               | L2a    | L3a | L4a | L5a | L6a |
| $\sigma_1$    | 4      | 8   | 4   | 4   | 8   |
| $\sigma_{11}$ |        | 12  |     |     | 12  |

## Statistically-corrected equilibrium constants for formation of intramolecular H-bonds

Table S2 *K<sub>EM</sub>* values for formation of an intramolecular phosphonate diester-phenol H-bond.<sup>a</sup>

| Porphyrin | Ligand       |              |              |              |              |
|-----------|--------------|--------------|--------------|--------------|--------------|
|           | L2a          | L3a          | L4a          | L5a          | L6a          |
| P1a       | 0.9          | <sup>b</sup> | <sup>b</sup> | 1.2          | <sup>b</sup> |
| P2a       | <sup>b</sup> | <sup>b</sup> | <sup>b</sup> | 0.4          | 0.2          |
| P3a       | 1.1          | <sup>b</sup> | <sup>b</sup> | <sup>b</sup> | <sup>b</sup> |
| P4a       | <sup>b</sup> | <sup>b</sup> | <sup>b</sup> | <sup>b</sup> | <sup>b</sup> |

<sup>a</sup> Errors are ±50%.

<sup>b</sup> These complexes do not make detectable H-bonds.

5

## H-bond occupancy

Table S3 Occupancy of the H-bonded state for phosphonate diester-phenol H-bonds (%).

| Porphyrin | Ligand |     |     |     |     |
|-----------|--------|-----|-----|-----|-----|
|           | L2a    | L3a | L4a | L5a | L6a |
| P1a       | 78     |     |     | 82  |     |
| P2a       |        |     |     | 59  | 40  |
| P3a       | 81     |     |     |     |     |
| P4a       |        |     |     |     |     |

10
